# Supplementary material for: Integrin‐Targeting Fluorescent Proteins: Exploration of RGD Insertion Sites
Source: PubMed Central journal article supplement — Chembiochem. 2017 Jan 27;18(5):441–3. doi: 10.1002/cbic.201600514 (PMC5347895; doi:10.1002/cbic.201600514), 2017-01-27
Supplement: CBIC-18-441-s001.pdf [file CBIC-18-441-s001.pdf]

**CHEMBIOCHEM**

## Supporting Information

### **Integrin-Targeting Fluorescent Proteins: Exploration of RGD Insertion Sites**

Michael H. Sonntag, Jurgen Schill, and Luc Brunsveld\*<sup>[a]</sup>

cbic\_201600514\_sm\_miscellaneous\_information.pdf

## Materials and methods

All chemicals and compounds have been used without prior purification, if not otherwise stated. The restriction enzymes, T4 ligase, and isopropyl-beta-D-thiogalactopyranoside (IPTG) have been obtained from Fermentas. DNA polymerase Platinum-Taq, and fetal bovine serum (FBS) was purchased from Invitrogen. All oligonucleotides were ordered from eurofinsgenomic. Bio-safe Coomassie Brilliant Blue, 30% acrylamide mix (30% Acrylamide/Bis Solution, 29:1 (3.3%C)), brom phenol blue, 6x DNA loading dye and N,N,N',N'-tetramethyl-ethane-1,2-diamine (TEMED) were purchased from BioRad. Sodium dodecyl sulfate (SDS), yeast extract, sodium chloride, imidazole, ammonium persulfate (APS), manganese (II) chloride (MnCl<sub>2</sub>), and Tween20 were ordered from Merck. Glycerol, glycine, guanidine hydrochloride (GndHCl) and ethylenediaminetetraacetic acid (EDTA) were obtained from Calbiochem. All competent *E.coli* cells, benzonase, Bugbuster, phosphate buffered saline (PBS) tablets and Ni-NTA resin were obtained from Novagen. Blue-white select screening reagent, β-mercaptoethanol, ampicillin, urea, egg lysozyme, nickel(II)sulfate hexahydrate (NiSO<sub>4</sub>), trypsin, sodium hydroxide (NaOH), tris (2-carboxyethyl) phosphine (TCEP), dithiothreitol (DTT), tris-base, magnesium chloride (MgCl<sub>2</sub>), and bovine serum albumin were obtained from Sigma. Agar was purchased from Difco. Amicon dialysis and concentration devices were obtained from Millipore. Filters (0.2 μm, 0.45 μm) were obtained from Pall. NucleoSpin Gel and PCR Clean-up kit was ordered from Macherey-Nagel and QIAprep Spin Miniprep kit from Qiagen. MaxiSorb plates were obtained from Nunc. All integrin variants were purchased from Millipore in Triton X-100 formulation. Goat anti-6-His antibody was obtained from Bethyl. Donkey Anti-Goat IgG (HRPO) antibody was bought from Leinco. TMB substrate and stopper solution were obtained from Cell Signaling. Milk powder was bought from Campina. The pHT293 plasmid containing the His-mCitrine was previously developed by us.<sup>1</sup>

### Site-directed mutagenesis of His-mCitrine-Strep:

The mutations in His-mCitrine-Strep were performed using the site-directed mutagenesis kit from Stratagene and primers listed below.

### Primer to insert or exchange to cysteines or GRGDS / GRADS sequences:

| Primer to insert the GRGDS sequence |                                                              |
|-------------------------------------|--------------------------------------------------------------|
| 0/1_F                               | aattaaaggaggaaggatctatggggcgcggggactctcaccatcatcatcatcattctc |
| 0/1_R                               | gaagaatgatgatgatgatggtagagagtcgcccgccccatagatccttctctttaatt  |
|                                     |                                                              |
| 240/241_F                           | ggagccatccgcaattgaaaaaggcgcggggactcttaacgtccccggg            |
| 240/241_R                           | ccccgggacggttaagagtcgcccgcccccttttcaattgcgatggctcc           |
|                                     |                                                              |
| 49/50_F                             | aagttcatctgcaccggcgcggggactctaccggaagctgcc                   |
| 49/50_R                             | gggcagcttgcggtagagtcgcccgccccggtgcagatgaactt                 |
|                                     |                                                              |
| 78/79_F                             | ctaccccgaccacatggggcgcggggactctaaagcagcagcacttct             |
| 78/79_R                             | agaagtcgtgctgcttagagtcgcccgccccatgtggtcgggtag                |
|                                     |                                                              |
| 116/117_F                           | gtgaagttcgagggcgggcggggactctgacaccctggtgaac                  |
| 116/117_R                           | gttcaccaggtgtcagagtcgcccgccccctcgaactcac                     |
|                                     |                                                              |

## Supporting information

|                                                                         |                                                                  |
|-------------------------------------------------------------------------|------------------------------------------------------------------|
| 140/141_F                                                               | catcctggggcacaaggggcggggactctctggagtacaactaca                    |
| 140/141_R                                                               | tgtagtgtactccagagagtccccgcgcccttgtgccccaggatg                    |
|                                                                         |                                                                  |
| 134/135_F                                                               | ttcaaggaggacggcgggcggggactctaacaatcctggggcac                     |
| 134/135_R                                                               | gtgccccaggatgtagagtccccgcgcccgctctctctgaa                        |
|                                                                         |                                                                  |
| 157/158_F                                                               | catggccgacaagcaggggcggggactctaagaacggcatcaagg                    |
| 157/158_R                                                               | ccttgatgccgttcttagagtccccgcgccctgcttgcggccatg                    |
|                                                                         |                                                                  |
| 172/173_F                                                               | gccacaacatcgagggcggggactctgacggcagcgtgca                         |
| 172/173_R                                                               | tgacgctgccgtcagagtccccgcgccctcgatgtgtggc                         |
|                                                                         |                                                                  |
| 194/195_F                                                               | ggccccgtgctggggcggggactctctgccccgacaac                           |
| 194/195_R                                                               | gttgcgggcagagagtccccgcgccagcacggggcc                             |
|                                                                         |                                                                  |
| 189/190_F                                                               | ccccatcggcgggcggggactctgacggccccgt                               |
| 189/190_R                                                               | acggggccgtcagagtccccgcgcccgatggggg                               |
|                                                                         |                                                                  |
| 213/214_F                                                               | caaagacccaacgagggcggggactctaagcgcgatcacatgg                      |
| 213/214_R                                                               | ccatgtgatcgccttagagtccccgcgccctggtgggtcttg                       |
| <b>Primers to exchange original mCitrine sequence to GRGDS sequence</b> |                                                                  |
| 49/53 FE                                                                | gaccctgaagttcatctgcggcagggcgattcgccctgcctgcccacc                 |
| 49/53 RE                                                                | ggtgggccagggcacggggaatcgccctgccgcagatgaattcagggtc                |
|                                                                         |                                                                  |
| 78/82 FE                                                                | ttgcccgtaccaccgacgggagggggacagcttctcaagtcgcatgcc                 |
| 78/82 RE                                                                | ggcatggcgacttgaagaagctgtccccctccgtggtcgggtagcggcgaa              |
|                                                                         |                                                                  |
| 116/121 FE                                                              | gcgccgagtgtaagttcagggccgcgattcgaaccgcatcgagctgaaggga             |
| 116/121 RE                                                              | tgccctcagctcgatgcggttcgaatcgccgcgccctgaactcactcggcgc             |
|                                                                         |                                                                  |
| 140/144 FE                                                              | cggcaacatcctgggacacggcgggggacagctacaacagccacaacgtc               |
| 140/144 FR                                                              | gacgttggtgctgttagctgtccccccgcccgtgccccaggatgtgccg                |
|                                                                         |                                                                  |
| 135/138 FE                                                              | aaggcatcgacttcaaggagacggcagggcgatagccacaagctggagtacaactacaacagcc |
| 135/138 FR                                                              | ggctgtgtagtgtactccagctgtggctatgccccgcccgtcctctctgaagtcgatgcctt   |
|                                                                         |                                                                  |
| 156/160 FE                                                              | ccacaacgtctatatcatggccgacggcgggggacagcatcaaggtgaactcaagatccg     |
| 156/160 RE                                                              | cggatcttgaagttaccttgatgctgtccccccgcccgtggccatgatagacgtgtgg       |
|                                                                         |                                                                  |
| 171/174 FE                                                              | cttcaagatccgccaacggcagggcgacagcgtcagctcgcgac                     |
| 171/174 RE                                                              | gtcggcagctgcacgctgtccccgcccgtgtggcgatcttgaag                     |
|                                                                         |                                                                  |

|                                                                               |                                                         |
|-------------------------------------------------------------------------------|---------------------------------------------------------|
| 194/198 FE                                                                    | gcgacggccccgtggggcgggcgacagccactacctgagct               |
| 194/198 RE                                                                    | agctcaggtagtggtctgccccccccacggggccgtcgc                 |
|                                                                               |                                                         |
| 190/194 FE                                                                    | gaacacccccatcgcccgggcgactcgtctgcccgacaac                |
| 190/194 RE                                                                    | gttgctgggcagcagcgagtcgcccgggccgatgggggttctc             |
|                                                                               |                                                         |
| 211/215 FE                                                                    | ccagtccgcctgagcaagacggcagggggatagcgatcacatggtctctgctgga |
| 211/215 RE                                                                    | tccagcaggacctgtgatcgtatccccctgccgtcttctcagggcgactgg     |
| <b>Primers to exchange the original mCitrine sequence to a GRADS sequence</b> |                                                         |
| 140/141GRADS_F                                                                | catcctggggcacaagggcgcgcgactctctggagtacaactaca           |
| 140/141GRADS_R                                                                | tgtagttgtactccagagagtcgccgcccccttctgccccaggatg          |
|                                                                               |                                                         |
| 194/195GRADS_F                                                                | ggccccgtgctggggcgcgcgactctctgcccgacaac                  |
| 194/195GRADS_R                                                                | gttgctgggcagagagtcgccgccccagcacggggcc                   |
| <b>Primer for mCitrine negative control</b>                                   |                                                         |
| C48V_F                                                                        | gcaagctgacctgaagttcatcgtgaccaccggcaagctg                |
| C48V_R                                                                        | cagctgccgggtgtcacgatgaacttcagggtcagcttgc                |

Amino acid sequence of His-mCitrine-Strep:

-mCitrine: bold

-GRGDS insertion positions: underlined

- GRGDS exchange positions: green box

M H H H H H S S G L V P R G S V S K G E E L F T G V V P I L V E L D G D V N G H K F S V S G E G  
E G D A T Y G K L T L K F I C **ITGKI** P V P W P T L V T T F G Y G L M C F A R Y P D H **MKQHD**  
F F K S A M P E G Y V Q E R T I F F K D D G N Y K T R A E V K F E **GDTLV** N R I E L K G I D F K E  
D **GNILGH** **KLEYN** Y N S H N V Y I M A D **KQKNG** I K V N F K I R H N **IEDGS** V Q L A D H  
Y Q Q N T P I G **DGPVLLPDN** H Y L S Y Q S A L S K D **PNEKR** R D H M V L L E F V T A A G I S R  
V D V A W S H P Q F E K Stop

Expression of His-mCitrine-Strep:

The different constructs were transformed in *E.coli* BL21 (DE3) cells. Clones containing the respective plasmid were inoculated in 20 ml Luria Bertani (LB) culture containing 50 µg / ml ampicillin. The culture was grown in a shaking incubator at 37°C overnight. On the next day, 10 ml of the overnight culture were used to inoculate 1 liter LB media containing 50 µg / ml ampicillin. The culture was placed on a shaking incubator at 37°C for about 2.5 hours. At an optical density of  $A_{600} = 0.9$ , the expression was induced with IPTG, final concentration 1 mM. The culture was placed back into the shaking incubator and incubated at 25°C overnight. Subsequently, the culture was harvested and pelleted by centrifugation at 10000 g, 10 min, at 4°C. The cell pellet was stored at -80°C.

Purification of His-mCitrine-Strep:

The cell pellet was thawed at room temperature and re-suspended in 5-10 ml Bugbuster containing 1 µl / ml benzonase. To lyse the cells, the mixture was incubated 30 min at 4°C on a shaker and centrifuged at 10000 g for 10 min. The soluble fraction was collected and loaded onto 5 ml Ni-NTA resin equilibrated with 5

## Supporting information

---

column volumes binding buffer (20 mM Tris, 500 mM NaCl, pH 7.8). Subsequently the resin was washed with 5 column volumes wash buffer (binding buffer, 40 mM imidazole) and eluted with 5 column volumes elution buffer (binding buffer, 300 mM imidazole). All obtained fractions (loading, washing, eluting) were analyzed by SDS-PAGE gel electrophoresis and LC-MS. The eluent fraction was dialyzed 4 times against PBS and concentrated via Amicon filters (cut-off 10 kDa) to a final volume of 0.5 – 2 ml.

### SDS-PAGE:

SDS-PAGE electrophoresis was performed on a Mini-PROTEAN 3 electrophoresis system (Biorad, Hercules, California). The gel consisted of a 5% stacking gel and a 12% or 15% separating gel. The running buffer contained 25mM Tris-HCl, 250mM glycine, and 0.1% (w/v) SDS in H<sub>2</sub>O. Prior loading onto the SDS-gel, all protein samples have been a) mixed with sample buffer (100mM Tris-HCl, 20% (v/v) glycerol, 4% (w/v) SDS, 0.2% (w/v) bromophenol blue, pH 6.8 in Millipore H<sub>2</sub>O) in a ratio 1:3, b) reduced by addition of  $\beta$ -mercaptoethanol and c) denatured by heating up the sample to 95 °C for 10 min. The electrophoresis was run at room temperature at 80 V for 20 min. and then at 140-160V for 60 min. The protein bands were stained with Coomassie Brilliant Blue.

### Microtiter-plate based integrin binding assay:

MaxiSorb plates were coated with 100  $\mu$ l integrin (0.5  $\mu$ g / ml dissolved in: 50 mM Tris, 150 mM NaCl, 1 mM MgCl<sub>2</sub>, 2 mM MnCl<sub>2</sub>, pH 7.4) on a shaker for 24 h at room temperature. Subsequently each well was washed three times 10 min with 100  $\mu$ l blocking buffer (50 mM Tris, 150 mM NaCl, 1 mM MgCl<sub>2</sub>, 2 mM MnCl<sub>2</sub>, pH 7.4, 0.1% milk powder (w/v)). The plates were incubated 24 h at 4°C in the dark with 100  $\mu$ l His-mCitrine-Strep (150  $\mu$ g / ml diluted in blocking buffer) and washed three times 10 min with 100  $\mu$ l wash buffer (50 mM Tris, 150 mM NaCl, 1 mM MgCl<sub>2</sub>, 2 mM MnCl<sub>2</sub>, pH 7.4, 0.05% Tween 20 (w/v)). The washed plate was blocked three times 10 min with 100  $\mu$ l blocking buffer and subsequently incubated with 100  $\mu$ l Goat anti-6-His antibody (1:1000 diluted in blocking buffer). After an incubation time of 24 h at 4°C in the dark, the antibody was removed and the plate washed three times for 10min with 100  $\mu$ l wash buffer as well as 100  $\mu$ l blocking buffer. After blocking, 100  $\mu$ l of the second antibody (Donkey Anti-Goat IgG (HRPO) 1:10000 diluted in blocking buffer) was added and the plate was incubated 24 h at 4°C in the dark. Subsequently, the second antibody was removed and the plates washed three times for 10 min with 100  $\mu$ l wash buffer as well as 100  $\mu$ l blocking buffer. 100  $\mu$ l TMB substrate was added and the plate was incubated for 15 min at 37°C in the dark. The enzymatic substrate conversion was stopped by the addition of 100  $\mu$ l stopper solution and the absorption was read out at 450 nm.

### Fluorescent spectroscopy:

The fluorescence spectra ( $\lambda_{\text{ex}} = 515$  nm,  $\lambda_{\text{em}} = 520 - 650$  nm) of all His-mCitrine-Strep mutants were measured in Varian Cary Eclipse fluorescence equipped with a Perkin-Elmer PTP-1 Peltier temperature control system. All measurements were performed in quartz cuvettes (10 mm light path), 2 ml minimal volume, at 20°C, concentration 1  $\mu$ M in PBS.

### Absorbance spectroscopy:

The UV-VIS absorbance spectra of all His-mCitrine-Strep mutants were recorded in a Jasco V-650 spectrophotometer equipped with a Perkin-Elmer PTP-1 Peltier temperature control system. All measurements were performed in quartz cuvettes (10 mm light path), 2 ml minimal volume, at 20°C, concentration 1  $\mu$ M in PBS.

## Supporting Figures and Tables

Supporting Table 1: Amino acid positions for GRGDS or cysteine insertion / exchange. Underlined amino acids: inserted / exchanged amino acids. \*Mutation that could not be obtained.

|                        | <b>Before mutagenesis</b> | <b>After mutagenesis</b> |
|------------------------|---------------------------|--------------------------|
| <b>GRGDS inserted</b>  |                           |                          |
| 0/1                    | RGSVSK                    | RGS <u>GRGDS</u> VSK     |
| 49/50                  | FICTTG                    | FICGRGDSTTG              |
| 78/79                  | DHMKQH                    | DHM <u>GRGDS</u> KQH     |
| 116/117                | FEGDTL                    | FEG <u>GRGDS</u> DTL     |
| 134/135                | EDGNIL                    | EDG <u>GRGDS</u> NIL     |
| 140/141                | GHKLEY                    | GHK <u>GRGDS</u> LEY     |
| 157/158                | DKQKNG                    | DKQ <u>GRGDS</u> KNG     |
| 172/173                | NIEDGS                    | NIE <u>GRGDS</u> DGS     |
| 189/190                | PIGDGP                    | PIG <u>GRGDS</u> DGP     |
| 194/195                | PVLLPD                    | PVL <u>GRGDS</u> LPD     |
| 213/214                | PNEKRD                    | PNE <u>GRGDS</u> KRD     |
| 240/241                | PQFEK                     | PQFEK <u>GRGDS</u>       |
| <b>GRGDS exchanged</b> |                           |                          |
| 49/53                  | TTGKL                     | <u>GRGDS</u>             |
| 78/82                  | MKQHD                     | <u>GRGDS</u>             |
| 116/121                | GDTLV                     | <u>GRGDS</u>             |
| 135/138                | GNILG                     | <u>GRGDS</u>             |
| 140/144                | KLEYN                     | <u>GRGDS</u>             |
| 156/160                | KQKNG                     | <u>GRGDS</u>             |
| 171/174                | IEDGS                     | <u>GRGDS</u>             |
| 190/194                | DGPVG                     | DGPVG*                   |
| 194/198                | LLPDN                     | <u>GRGDS</u>             |
| 211/215                | PNEKR                     | <u>GRGDS</u>             |
| <b>Control</b>         |                           |                          |
| C48V                   | KFICTTG                   | KFI <u>V</u> TTG         |

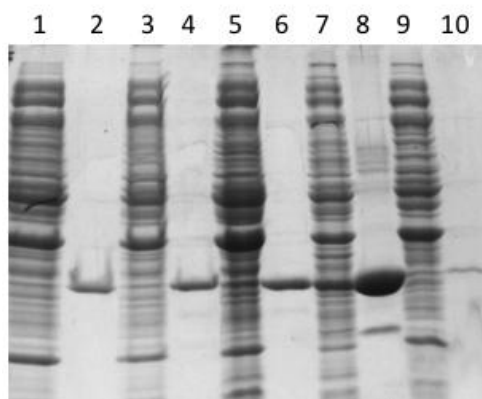

Supporting Figure 1. Representative SDS-PAGE of selective protein constructs comparing different mCitrine-RGD constructs before and after Ni-NTA purification. The gel is representative for all mCitrine-RGD/cysteine constructs. Lane 1/2: 49/50, lane 3/4: 78/79, lane 5/6: 116/117, lane 7/8: 140/141, lane 9/10: 134/135.

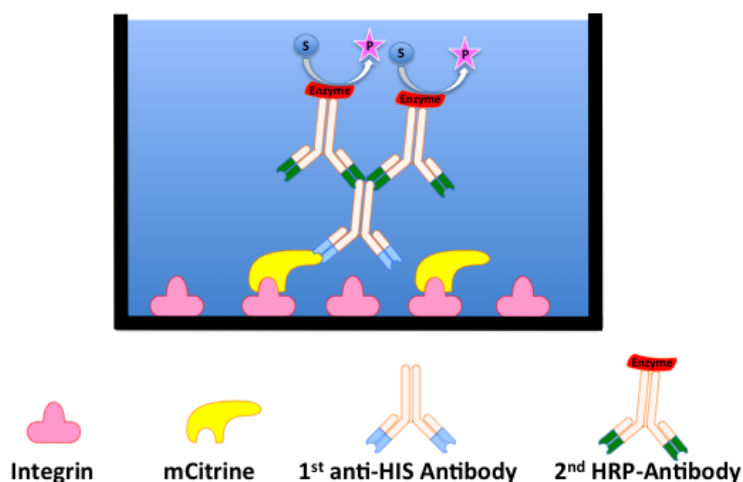

Supporting Figure 2. Schematic representation of the microtiter-plate based integrin binding assay. Integrins receptors were immobilized on the surface of multi-well plates and incubated with RGD-mCitrine. Binding of RGD-mCitrine (containing a His-tag) was detected using primary anti-His antibodies. The signal was amplified using a secondary antibody conjugated to horseradish peroxidase (HRPO). Following TMB substrate conversion by HRPO, the binding was quantified at 450 nm.

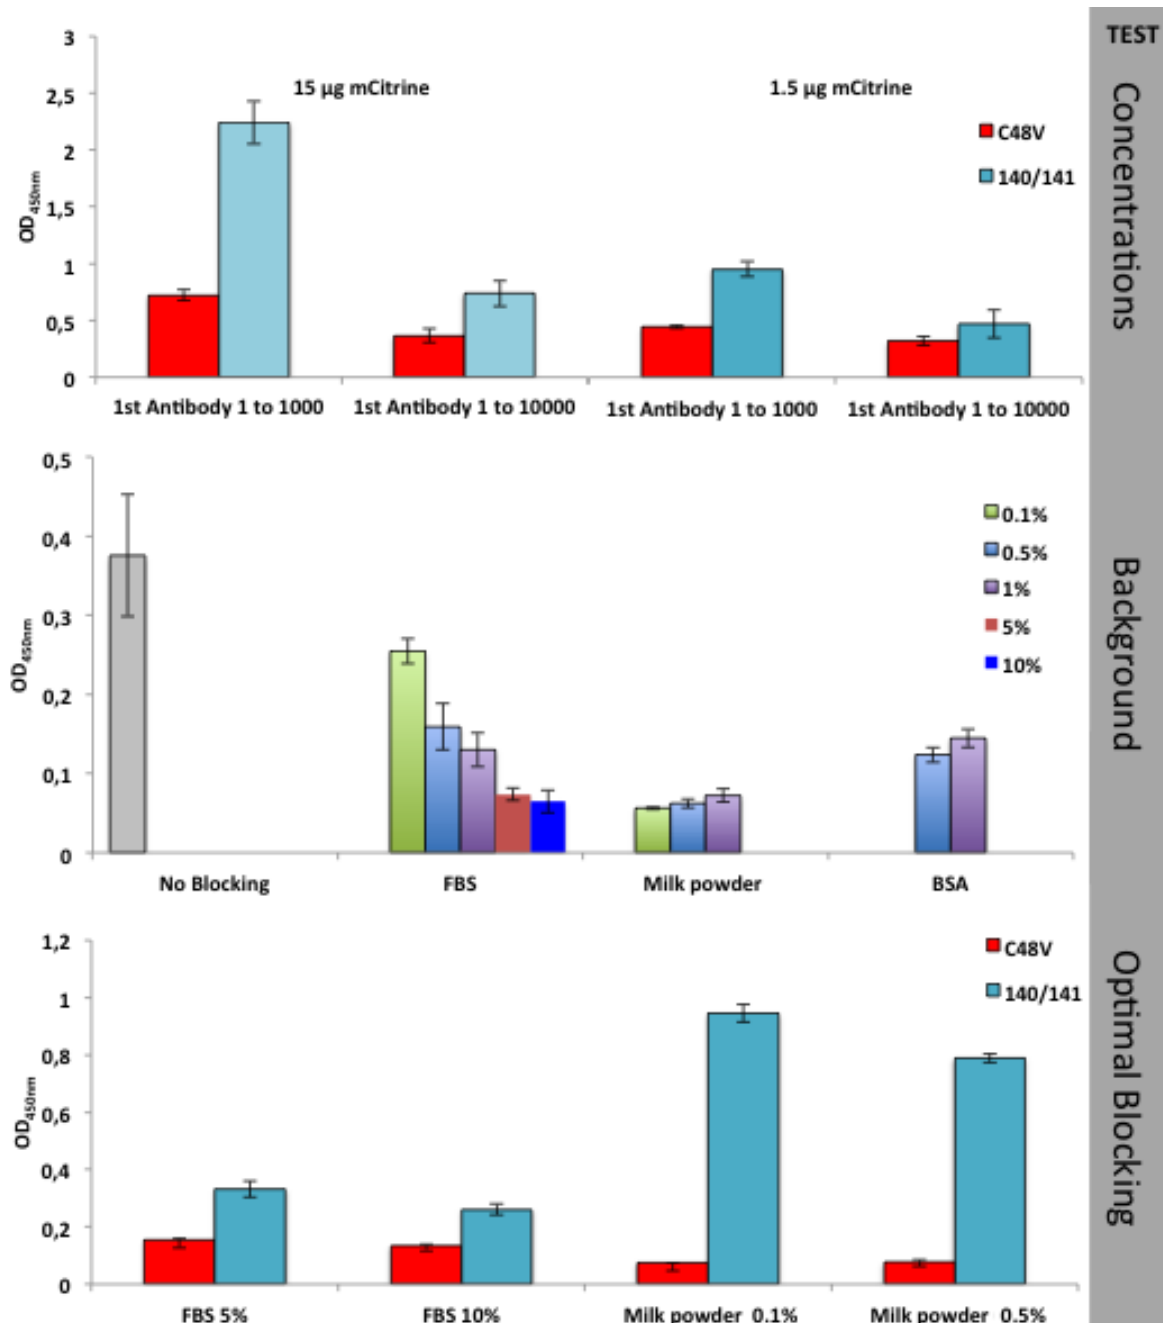

Supporting Figure 3. Determination of optimal conditions for the microtiter-plate based integrin binding assay. Top: Comparison of different mCitrine and primary antibody concentration on plates coated with human integrin receptor  $\alpha V\beta 3$  ( $0.05 \mu\text{g}$  / well in 96 well-plates), blocking reagent 0.5% BSA, Middle: Comparison of different blocking reagents, primary antibody 1:1000 diluted, well-plates not coated. Bottom: Comparison of the blocking reagents FBS and milk powder on plates coated with human integrin receptor:  $\alpha V\beta 3$  ( $0.05 \mu\text{g}$  / well using 96 well-plates), primary antibody 1:1000 diluted. mCitrine-RGD 140/141 was used as positive control, mCitrine C48V was used as negative control. Primary antibody: goat-anti-His, secondary antibody: anti-goat HRPO. All antibodies were diluted in 0.1% blocking reagent, the secondary antibody was diluted 1:10000. Optimal determined concentrations: mCitrine:  $15 \mu\text{g}$  / well, primary antibody: 1:1000, secondary antibody: 1:10000, Blocking reagent: milk powder 0.1%.



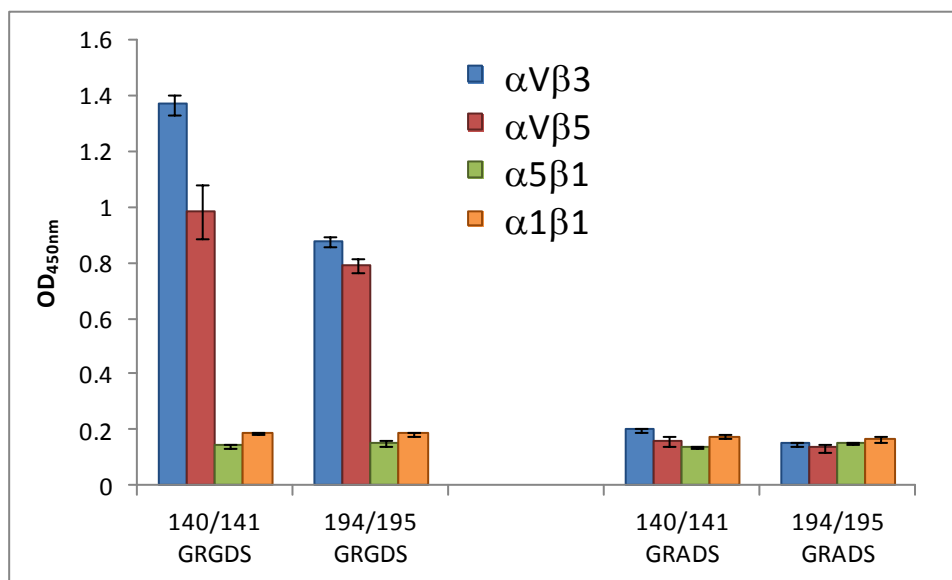

Supporting Figure 4. Screening overview of mCitrine-RGD mutants in comparison to the respective mCitrine-RAD mutants. All mutants were screened against four human integrin receptors:  $\alpha V\beta 3$ ,  $\alpha V\beta 5$ ,  $\alpha 5\beta 1$  and  $\alpha 1\beta 1$ .

### Supporting References

<sup>1</sup> T. Phan, H. D. Nguyen, H. Göksel, S. Möcklinghoff, L. Brunsveld Phage display selection of miniprotein binders of the Estrogen Receptor Chem. Commun., 2010,46, 8207-8209.
